# Supplementary material for: Evidence for adaptive evolution of low-temperature stress response genes in a Pooideae grass ancestor
Source: PubMed Central journal article supplement (PMC3840698; doi:10.1111/nph.12337), 2013-05-23
Supplement: nph0199-1060-sd1.pdf [file nph0199-1060-sd1.pdf]

## Methods S1

### Sequencing and assembly of a *Festuca pratensis* transcriptome

#### Plant material and cDNA library construction

For the *F. pratensis* transcriptome sequencing we used two unrelated genotypes, a Yugoslavian cultivar (B14/16) and a Norwegian cultivar (HF2/7) (Ergon, Fang et al. 2006). Plants were grown at 17/12°C day/night, 16/8h light/darkness with light intensity of 135  $\mu\text{molm}^{-2}\text{s}^{-1}$  (400W HQI-BT Osram bulbs). Tissues from crown, stem and leaves were pooled and total RNA (100mg) was isolated using the RNeasy Mini kit (Qiagen, Hilden, Germany) and RNeasy MinElute kit (Qiagen).

Two microgram RNA was used for cDNA synthesis using MINT-Universal cDNA synthesis kit, protocol-II (Evrogen). Amplified cDNAs were purified using Qiaquick PCR purification kit (Qiagen), EtOH precipitated, air dried, dissolved in 20 micro liter of sterile water, and stored at -20°C until used for 454 sequencing on the GS-FLEX following the protocol of the manufacturer.

#### De novo sequence assembly

*De novo* assembly of the 454 transcriptome sequences was done with the CLC genomics workbench (<http://www.clcbio.com/index.php?id=1240>). Because our transcriptome sequences were derived from two highly heterozygous (out breeding) individuals, we used multi-step approaches in the process of creating de novo assembled cDNA contigs. In the first step, we

performed *de novo* assemblies using reads from one genotype at the time. Because grass genomes typically are complex in respect to paralog numbers we chose stringent criteria for the initial assembly step. For the diploid *F. pratensis* minimum overlap length (L) was set to 20% of the read length, and percent similarity for read overlap (S) was set to 99%. In the second step of the *de novo* assembly we re-assembled contigs from the first step to allow for the collapse of diverse alleles into single contigs. This was done by performing a second *de novo* assembly in CLC with the genotype specific contigs from step 1 as input, using the parameters L=80% and S = 95%.

## References

Ergon, A., C. Fang, et al. (2006). "Quantitative trait loci controlling vernalisation requirement, heading time and number of panicles in meadow fescue (*Festuca pratensis* Huds.)." Theoretical and Applied Genetics **112**(2): 232-242.

## **Methods S2:**

### **Sequencing, assembly and expression analyses of differential expressed transcripts between cold treated and non-cold treated *Lolium perenne* plants**

#### **Plant material for RNA isolation**

Leaf material was collected at following time points: 0 hours, 2 days, 4 weeks, and 9 weeks of vernalization. Plants were grown for 2 months with simulated fall conditions (15°C and 8 hour day length) before initiation of vernalization treatment (6°C and 8 hour day length). Plant material was harvested between 9-10 am.

#### **Sequencing**

One biological replicate and three technical replicates were used in the sequencing process. The value of the Pearson's correlation coefficient for the three technical replicates was >0.99, thus all three technical replicates were pooled to acquire higher sequencing depth (Wang et al. 2010). A total of 68,852,859 reads with a length of 50 bp were generated on the Illumina Genome Analyzer II.

#### ***De novo* assembly of reads**

Reads from both leaf and enriched meristem were combined and subsequently assembled using Trinity software (Grabherr et al. 2011). The number and length of the assembled contigs are presented in the table below.

#### **Analyses of differential expression**

In order to assess the expression level, we used RSEM software (Li and Dewey 2011) to generate the raw count data for each assembled transcript. Sequence reads were mapped onto the assembled sequences, allowing up to one mismatch in the seed region (the first 25 bp) of the reads. More than 90% of reads were reported with at least one alignment across all time points and all samples.

DESeq software (Anders and Huber 2010) was used to assess differential expression between the non-vernalized and vernalized plants at different time points. The option involving no biological replicates identified a total of 720 differentially expressed transcripts across all time points.

## References

- Anders, S. & W. Huber (2010) Differential expression analysis for sequence count data. *Genome Biol*, 11, R106.
- Grabherr, M. G., B. J. Haas, M. Yassour, J. Z. Levin, D. A. Thompson, I. Amit, X. Adiconis, L. Fan, R. Raychowdhury, Q. Zeng, Z. Chen, E. Mauceli, N. Hacohen, A. Gnirke, N. Rhind, F. di Palma, B. W. Birren, C. Nusbaum, K. Lindblad-Toh, N. Friedman & A. Regev (2011) Full-length transcriptome assembly from RNA-Seq data without a reference genome. *Nat Biotechnol*, 29, 644-52.
- Li, B. & C. N. Dewey (2011) RSEM: accurate transcript quantification from RNA-Seq data with or without a reference genome. *BMC Bioinformatics*, 12, 323.
- Wang, L., Z. Feng, X. Wang & X. Zhang (2010) DEGseq: an R package for identifying differentially expressed genes from RNA-seq data. *Bioinformatics*, 26, 136-8.

**Table S1. Over-represented molecular function gene ontology (GO) terms in the low temperature induced genes subset.** GO terms are grouped according to their GO slim group. Some terms are represented in multiple GO slim groups.

| GO slim group                             | GO         | GO description                                   |
|-------------------------------------------|------------|--------------------------------------------------|
| Molecular function (GO:0003674)           | GO:0016209 | Antioxidant activity                             |
|                                           | GO:0004602 | Glutathione peroxidase activity                  |
| DNA binding (GO:0003677)                  | GO:0003918 | DNA topoisomerase (ATP-hydrolyzing) activity     |
| RNA binding (GO:0003723)                  | GO:0003723 | RNA binding                                      |
|                                           | GO:0030515 | snoRNA binding                                   |
| Catalytic activity (GO:0003824)           | GO:0004812 | Aminoacyl-tRNA ligase activity                   |
|                                           | GO:0016875 | Ligase activity, forming carbon-oxygen bonds     |
|                                           | GO:0004619 | Phosphoglycerate mutase activity                 |
|                                           | GO:0003756 | Protein disulfide isomerase activity             |
|                                           | GO:0015036 | Disulfide oxidoreductase activity                |
|                                           | GO:0004602 | Glutathione peroxidase activity                  |
|                                           | GO:0003883 | CTP synthase activity                            |
|                                           | GO:0015038 | Glutathione disulfide oxidoreductase activity    |
|                                           | GO:0015035 | Protein disulfide oxidoreductase activity        |
|                                           | GO:0003918 | DNA topoisomerase (ATP-hydrolyzing) activity     |
| Structural molecule activity (GO:0005198) | GO:0004133 | Glycogen debranching enzyme activity             |
|                                           | GO:0003735 | Structural constituent of ribosome               |
| Transporter activity (GO:0005215)         | GO:0017056 | Structural constituent of nuclear pore           |
|                                           | GO:0008565 | Protein transporter activity                     |
| Binding (GO:0005488)                      | GO:0005384 | Manganese ion transmembrane transporter activity |
|                                           | GO:0005507 | Copper ion binding                               |
|                                           | GO:0030170 | Pyridoxal phosphate binding                      |
|                                           | GO:0019842 | Vitamin binding                                  |
| Protein binding (GO:0005515)              | GO:0030247 | Polysaccharide binding                           |
|                                           | GO:0019903 | Protein phosphatase binding                      |
| Translation factor activity (GO:0008135)  | GO:0051082 | Unfolded protein binding                         |
|                                           | GO:0003743 | Translation initiation factor activity           |
| Lipid binding (GO:0008289)                | GO:0003746 | Translation elongation factor activity           |
|                                           | GO:0005546 | Phosphatidylinositol-4,5-bisphosphate binding    |
| Transferase activity (GO:0016740)         | GO:0004576 | Oligosaccharyl transferase activity              |
|                                           | GO:0016760 | Cellulose synthase (UDP-forming) activity        |
| Hydrolase activity (GO:0016787)           | GO:0004630 | Phospholipase D activity                         |
|                                           | GO:0008967 | Phosphoglycolate phosphatase activity            |
|                                           | GO:0003918 | DNA topoisomerase (ATP-hydrolyzing) activity     |
| Enzyme regulator activity (GO:0030234)    | GO:0016798 | Hydrolase activity, acting on glycosyl bonds     |
|                                           | GO:0001671 | ATPase activator activity                        |
| Carbohydrate binding (GO:0030246)         | GO:0030247 | Polysaccharide binding                           |

**Table S1. Under-represented molecular function gene ontology (GO) terms in the low temperature induced genes subset.** GO terms are grouped according to their GO slim group. Some terms are represented in multiple GO slim groups.

| GO slim group                     | GO         | Description                                            |
|-----------------------------------|------------|--------------------------------------------------------|
| DNA binding (GO:0003677)          | GO:0003677 | DNA binding                                            |
| Binding (GO:0005488)              | GO:0008270 | Zinc ion binding                                       |
|                                   | GO:0020037 | Heme binding                                           |
| Kinase activity (GO:0016301)      | GO:0004674 | Protein serine/threonine kinase activity               |
|                                   | GO:0016301 | Kinase activity                                        |
|                                   | GO:0004713 | Protein tyrosine kinase activity                       |
|                                   | GO:0016773 | Phosphotransferase activity, alcohol group as acceptor |
| Transferase activity (GO:0016740) | GO:0004674 | Protein serine/threonine kinase activity               |
|                                   | GO:0004713 | Protein tyrosine kinase activity                       |

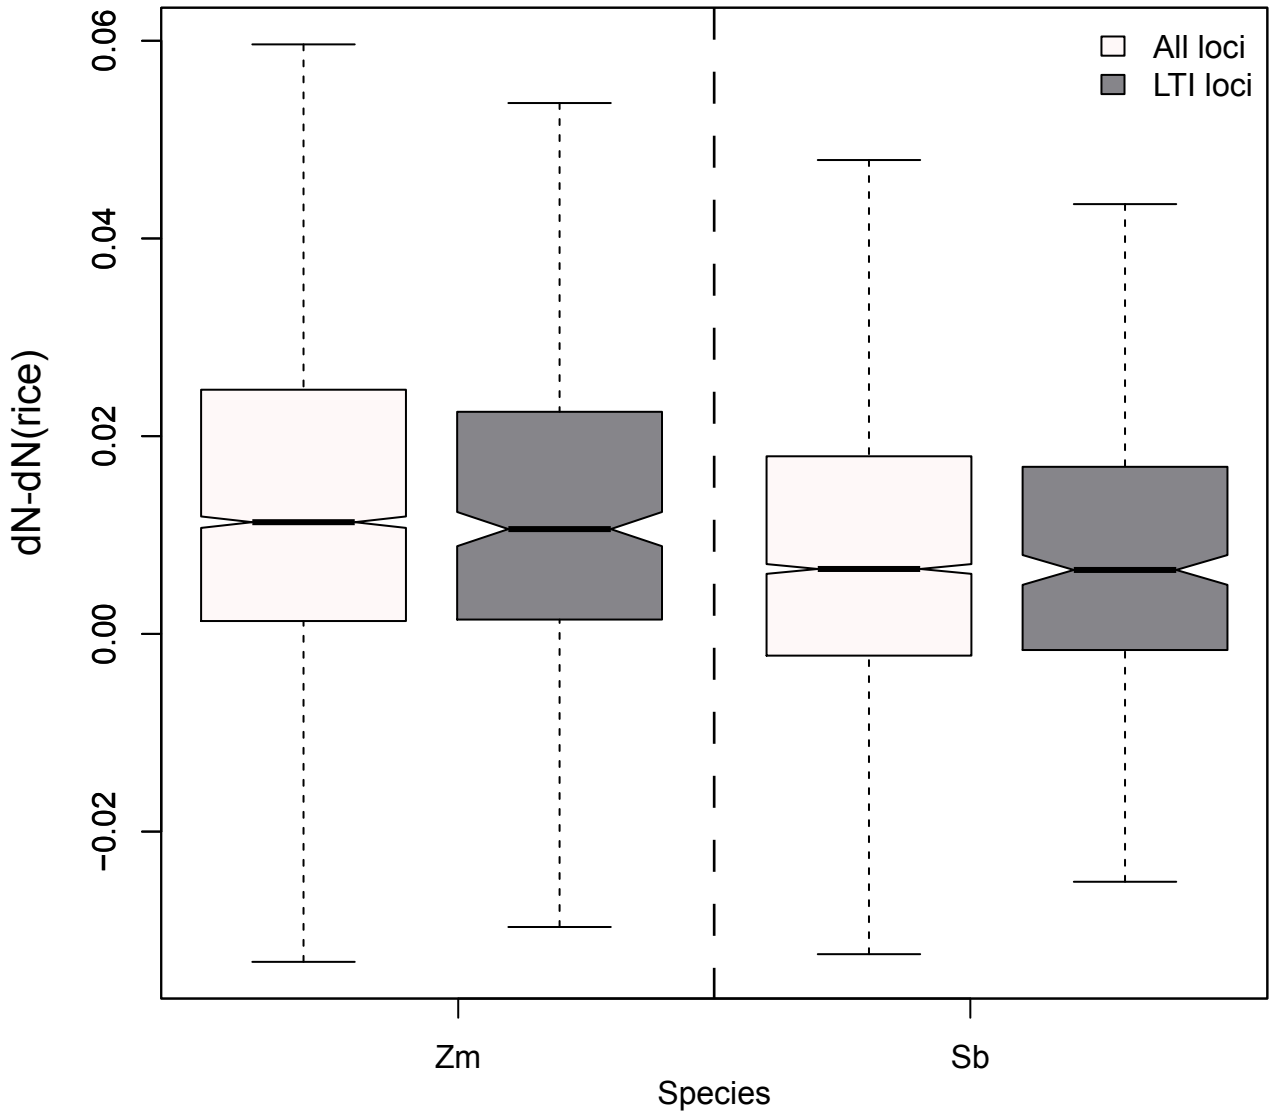

**Figure S1. dN rate differences between maize-rice and sorghum-rice.** Species abbreviations: Zm = maize, Sb = sorghum.
